# Supplementary material for: Predicting Broad-Spectrum Antiviral Drugs against RNA Viruses Using Transcriptional Responses to Exogenous RNA
Source: Preprints.org preprint supplement (doi:10.20944/preprints202003.0437.v2), 2021-01-08
Supplement: Supplementary file 1 [file supplementary]

**Predicting broad-spectrum antiviral drugs against RNA viruses using transcriptional responses to exogenous RNA**

**Supplementary Materials**

1. **Links to Data Sources**

Below we provide links to previously published gene lists that were used in this study.

**Cas9 mRNA signature:** The raw data file for differentially expressed genes following Cas9 mRNA and sgRNA delivery into HSPCs was obtained from Supplementary Data S1 of Cromer et al (*1*) and is accessible at https://www.ncbi.nlm.nih.gov/pmc/articles/PMC6171165/bin/mmc2.xlsx

**RNP signature:** The raw data file for differentially expressed genes following RNP delivery into HSPCs was obtained from Supplementary Data S1 of Cromer et al (*1*) and is accessible at https://www.ncbi.nlm.nih.gov/pmc/articles/PMC6171165/bin/mmc2.xlsx

**Core ISGs gene set:** The core ISGs gene set was obtained from the Supplementary Table S3 of Shaw et al (*2*) and is accessible at https://doi.org/10.1371/journal.pbio.2004086.s008

1. **Supplementary Figures**

**Supplementary Figure 1: Full list of genes with significant connectivity (tau, τ > 90) to Interferon Stimulated Genes (ISGs)**

**
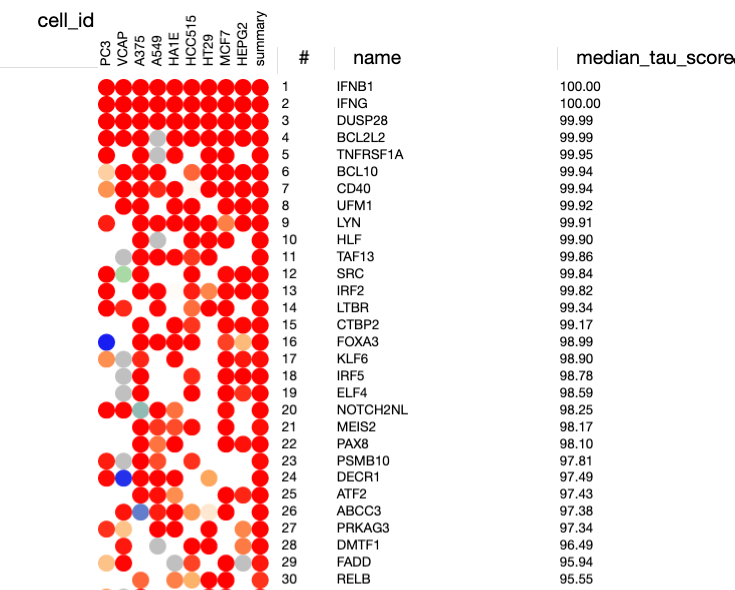
**

**
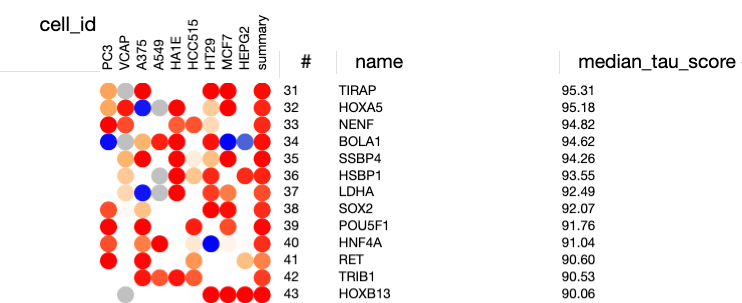
**

**Supplementary Figure 2: Full list of small molecules with significant connectivity (tau, τ > 90) to CRISPR/Cas9 mRNA**

**
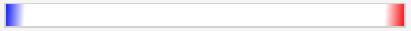
**

100

-100

**
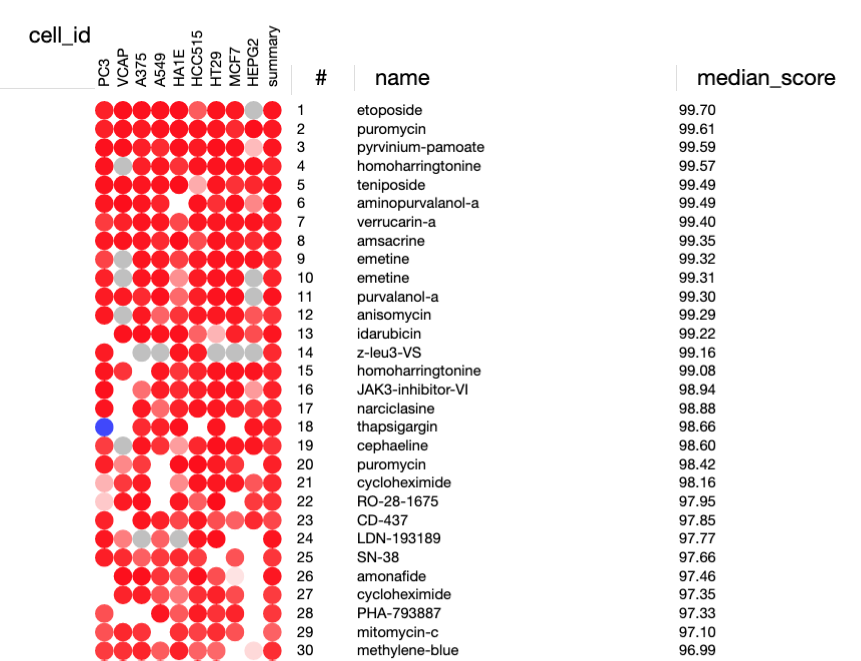
**

**
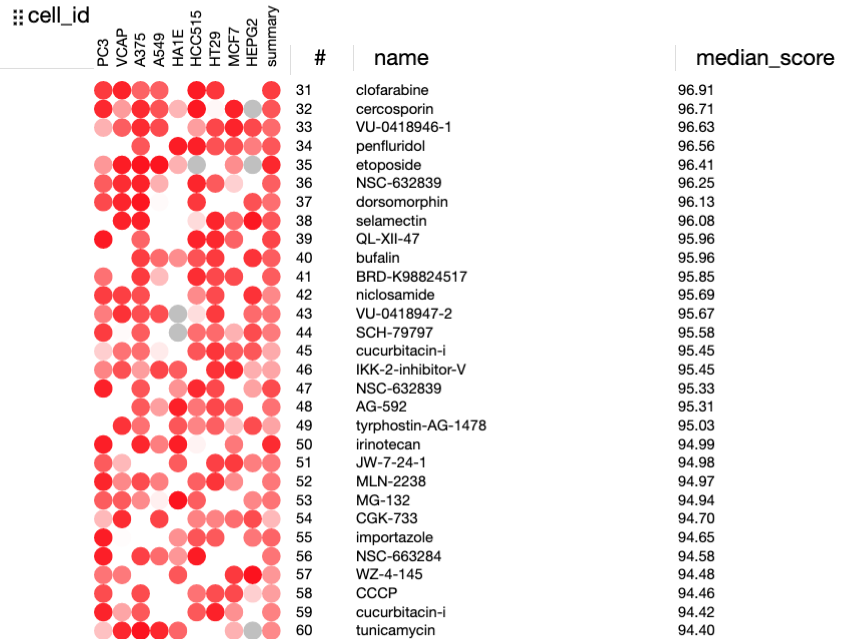
**

**
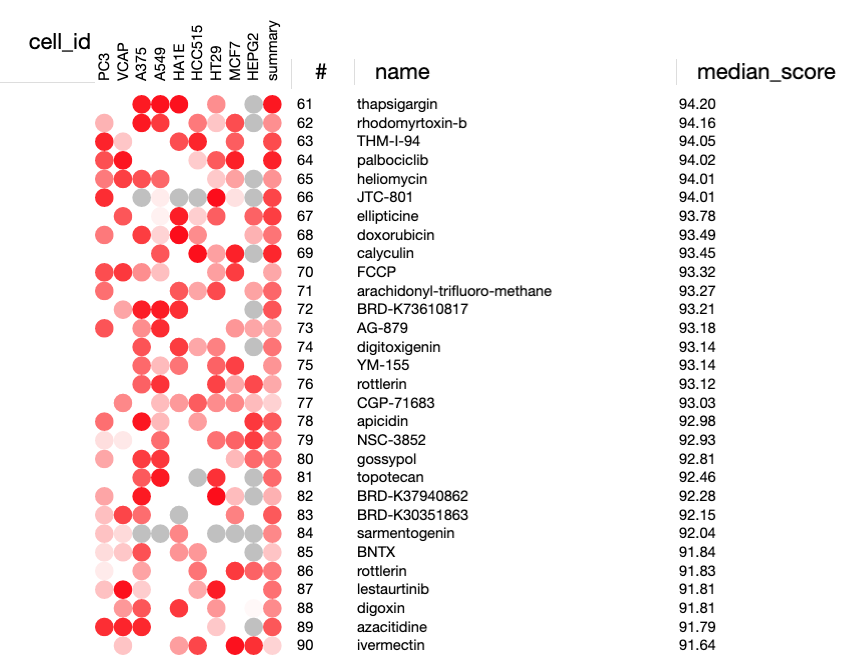
**

**
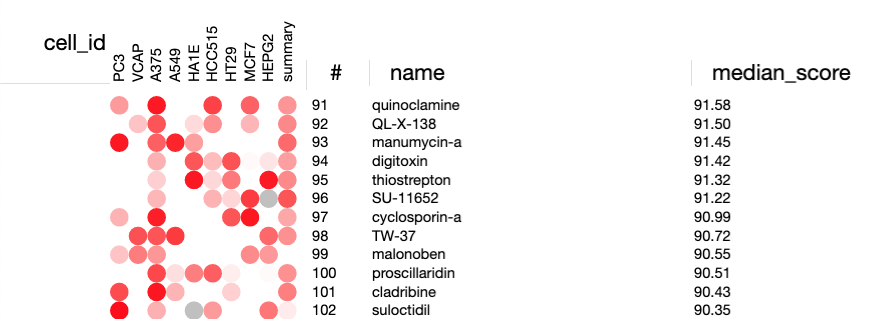
**

**Supplementary Figure 3: Full list of small molecules with significant connectivity (tau, τ > 90) to Core ISGs**


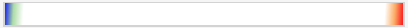


100

-100


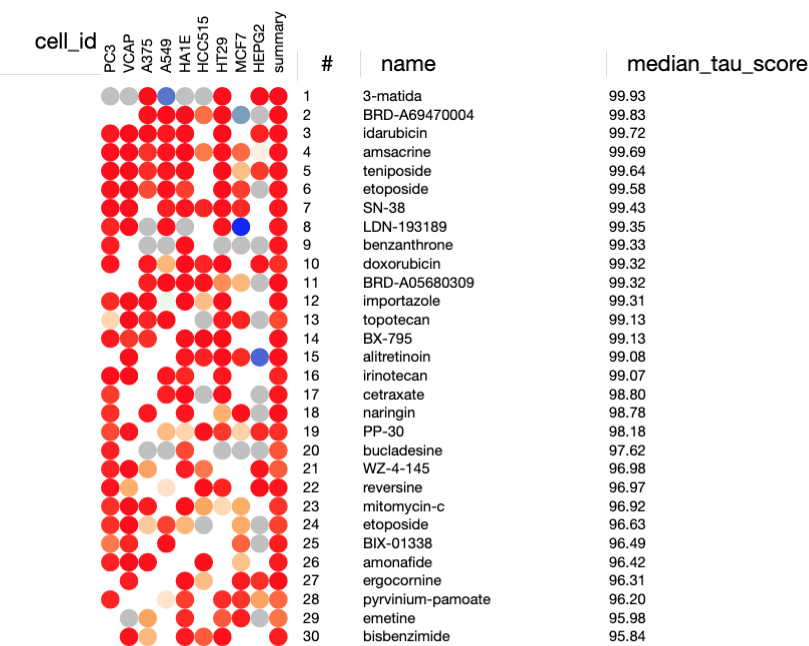


**
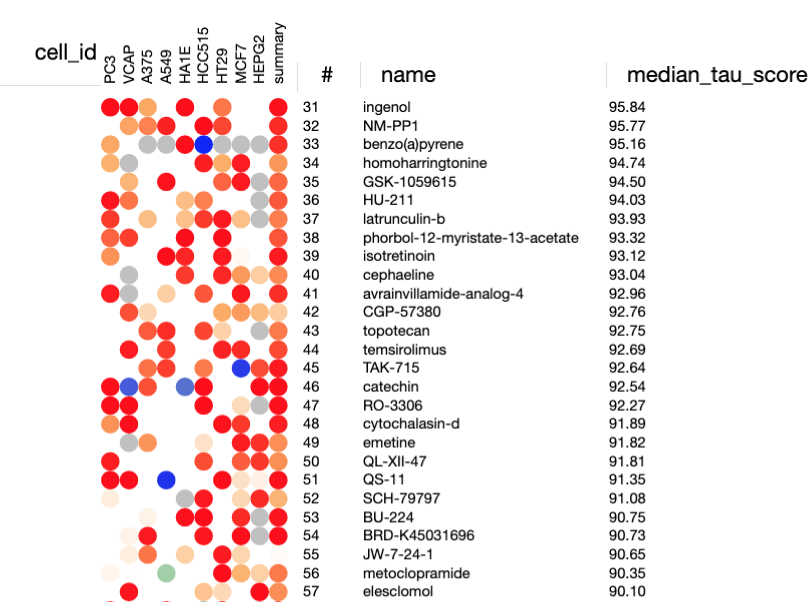
**

**Supplementary Figure 4: Full top 30 list of small molecules including those with significant connectivity (score > 90) to RNPs**

**
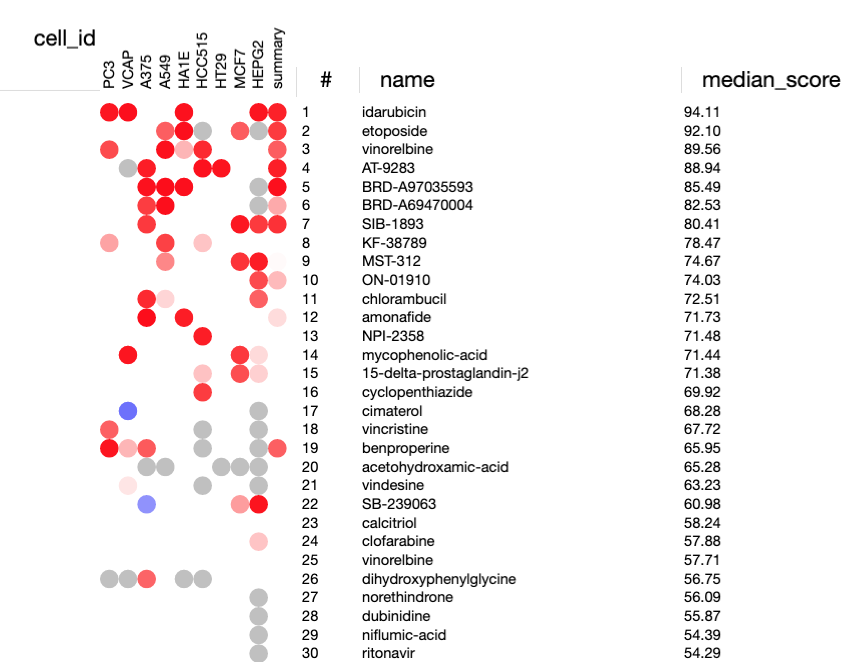
**

**References**

1. M. K. Cromer *et al.*, Global Transcriptional Response to CRISPR/Cas9-AAV6-Based Genome Editing in CD34+ Hematopoietic Stem and Progenitor Cells. *Mol. Ther.* (2018), doi:10.1016/j.ymthe.2018.06.002.

2. A. E. Shaw *et al.*, Fundamental properties of the mammalian innate immune system revealed by multispecies comparison of type I interferon responses. *PLoS Biol.* (2017), doi:10.1371/journal.pbio.2004086.
